# Supplementary material for: Development and Evaluation of MR-Based Radiogenomic Models to Differentiate Atypical Lipomatous Tumors from Lipomas
Source: MDPI journal article supplement (doi:10.3390/cancers15072150), 2023-04-05
Supplement: s1 [file s1]

## Supplemental Material

| Sequence                 | T <sub>1</sub>  |                 | T <sub>2</sub>  |                 | T <sub>1</sub> -FS-GD |                 |
|--------------------------|-----------------|-----------------|-----------------|-----------------|-----------------------|-----------------|
| Field strength (T)       | 1.5             | 3.0             | 1.5             | 3.0             | 1.5                   | 3.0             |
| Repetition time (ms)     | 537-557         | 855-1100        | 4020-6110       | 4260-5600       | 500-595               | 722-1050        |
| Echo time (ms)           | 15-16           | 12              | 85-104          | 78-94           | 13-16                 | 12-13           |
| Flip angle (°)           | 90-172          | 175-180         | 180             | 180             | 90-180                | 180-136         |
| In-plane resolution (mm) | 0.2-0.5x0.2-0.5 | 0.5-0.8x0.4-0.7 | 0.4-0.6x0.4-0.6 | 0.5-0.7x0.5-0.7 | 0.3-0.6x0.3-0.6       | 0.6-0.7x0.6-0.7 |
| Slice thickness (mm)     | 3-4             | 3-5             | 3-5             | 4-5             | 3-5                   | 4-5             |
| Gap (%)                  | 10-25           | 10-50           | 20-60           | 10-40           | 20-60                 | 10-40           |
| Bandwidth (Hz/pixel)     | 85-128          | 160-172         | 109-119         | 200-203         | 85-130                | 150-160         |
| Echo train length (n)    | 118             | 162-262         | 14-58           | 15-37           | 118                   | 116-288         |

GD: gadolinium-enhanced; FS: fat-saturated

Field of view was limited to the area of interest according to the respective tumor volume to maximize anatomical detail

Sequence parameters were adjusted in accordance with the optimal protocol of the anatomical tumor region

### Supplementary Material Table S1: Magnetic Resonance imaging sequence parameters

**Supplementary Material Table S2:** Extracted radiomics features (n=104)

All extracted features were computed according the “image biomarker standardization initiative” (IBSI) guidelines [1].

|    | <b>Shape Features</b>                                  |
|----|--------------------------------------------------------|
| 1  | Mesh Volume                                            |
| 2  | Voxel Volume                                           |
| 3  | Surface Area                                           |
| 4  | Surface Volume Ratio                                   |
| 5  | Sphericity                                             |
| 6  | Maximum 3D Diameter                                    |
| 7  | Maximum 2D Diameter Slice                              |
| 8  | Maximum 2D Diameter Column                             |
| 9  | Maximum 2D Diameter Row                                |
| 10 | Major Axis                                             |
| 11 | Minor Axis                                             |
| 12 | Least Axis                                             |
| 13 | Elongation                                             |
| 14 | Flatness                                               |
|    | <b>First Order Features</b>                            |
| 1  | Energy                                                 |
| 2  | Intensity Histogram Entropy                            |
| 3  | Minimum                                                |
| 4  | 10th Percentile                                        |
| 5  | 90th Percentile                                        |
| 6  | Maximum                                                |
| 7  | Mean                                                   |
| 8  | Median                                                 |
| 9  | Interquartile Range                                    |
| 10 | Range                                                  |
| 11 | Mean Absolute Deviation (MAD)                          |
| 12 | Root Mean Squared (RMS)                                |
| 13 | Skewness                                               |
| 14 | Excess Kurtosis                                        |
| 15 | Variance                                               |
| 16 | Intensity Histogram Uniformity                         |
|    | <b>Gray Level Co-occurrence Matrix (GLCM) Features</b> |
| 1  | Autocorrelation                                        |
| 2  | Joint Average                                          |
| 3  | Cluster Prominence                                     |
| 4  | Cluster Shade                                          |
| 5  | Cluster Tendency                                       |
| 6  | Contrast                                               |
| 7  | Correlation                                            |
| 8  | Difference Average                                     |
| 9  | Difference Entropy                                     |
| 10 | Difference Variance                                    |

|                                                                  |                                              |
|------------------------------------------------------------------|----------------------------------------------|
| 11                                                               | Joint Energy (IBSI: Angular Second Moment)   |
| 12                                                               | Joint Entropy                                |
| 13                                                               | Informal Measure of Correlation (IMC) 1      |
| 14                                                               | Informal Measure of Correlation (IMC) 2      |
| 15                                                               | Inverse Difference Moment (IDM)              |
| 16                                                               | Inverse Difference Moment Normalized (IDMN)  |
| 17                                                               | Inverse Difference (ID)                      |
| 18                                                               | Inverse Difference Normalized (IDN)          |
| 19                                                               | Inverse Variance                             |
| 20                                                               | Maximum Probability (IBSI: Joint maximum)    |
| 21                                                               | Sum Entropy                                  |
| 22                                                               | Sum of Squares (IBSI: Sum of Squares)        |
| 23                                                               | Maximal Correlation Coefficient (MCC)        |
| <b>Gray Level Size Zone Matrix (GLSZM) Features</b>              |                                              |
| 1                                                                | Small Area Emphasis (SAE)                    |
| 2                                                                | Large Area Emphasis (LAE)                    |
| 3                                                                | Gray Level Non-Uniformity (GLN)              |
| 4                                                                | Gray Level Non-Uniformity Normalized (GLNN)  |
| 5                                                                | Size-Zone Non-Uniformity (SZN)               |
| 6                                                                | Size-Zone Non-Uniformity Normalized (SZNN)   |
| 7                                                                | Zone Percentage (ZP)                         |
| 8                                                                | Gray Level Variance (GLV)                    |
| 9                                                                | Zone Variance (ZV)                           |
| 10                                                               | Zone Entropy (ZE)                            |
| 11                                                               | Low Gray Level Zone Emphasis (LGLZE)         |
| 12                                                               | High Gray Level Zone Emphasis (HGLZE)        |
| 13                                                               | Small Area Low Gray Level Emphasis (SALGLE)  |
| 14                                                               | Small Area High Gray Level Emphasis (SAHGLE) |
| 15                                                               | Large Area Low Gray Level Emphasis (LALGLE)  |
| 16                                                               | Large Area High Gray Level Emphasis (LAHGLE) |
| <b>Gray Level Run Length Matrix (GLRLM) Features</b>             |                                              |
| 1                                                                | Short Run Emphasis (SRE)                     |
| 2                                                                | Long Run Emphasis (LRE)                      |
| 3                                                                | Gray Level Non-Uniformity (GLN)              |
| 4                                                                | Gray Level Non-Uniformity Normalized (GLNN)  |
| 5                                                                | Run Length Non-Uniformity (RLN)              |
| 6                                                                | Run Length Non-Uniformity Normalized (RLNN)  |
| 7                                                                | Run Percentage (RP)                          |
| 8                                                                | Gray Level Variance (GLV)                    |
| 9                                                                | Run Variance (RV)                            |
| 10                                                               | Run Entropy (RE)                             |
| 11                                                               | Low Gray Level Run Emphasis (LGLRE)          |
| 12                                                               | High Gray Level Run Emphasis (HGLRE)         |
| 13                                                               | Short Run Low Gray Level Emphasis (SRLGLE)   |
| 14                                                               | Short Run High Gray Level Emphasis (SRHGLE)  |
| 15                                                               | Long Run Low Gray Level Emphasis (LRLGLE)    |
| 16                                                               | Long Run High Gray Level Emphasis (LRHGLE)   |
| <b>Neighbouring Gray Tone Difference Matrix (NGTDM) Features</b> |                                              |

|                                                     |                                                    |
|-----------------------------------------------------|----------------------------------------------------|
| 1                                                   | Coarseness                                         |
| 2                                                   | Contrast                                           |
| 3                                                   | Busyness                                           |
| 4                                                   | Complexity                                         |
| 5                                                   | Strength                                           |
| <b>Gray Level Dependence Matrix (GLDM) Features</b> |                                                    |
| 1                                                   | Small Dependence Emphasis (SDE)                    |
| 2                                                   | Large Dependence Emphasis (LDE)                    |
| 3                                                   | Gray Level Non-Uniformity (GLN)                    |
| 4                                                   | Dependence Non-Uniformity (DN)                     |
| 5                                                   | Dependence Non-Uniformity Normalized (DNN)         |
| 6                                                   | Gray Level Variance (GLV)                          |
| 7                                                   | Dependence Variance (DV)                           |
| 8                                                   | Dependence Entropy (DE)                            |
| 9                                                   | Low Gray Level Emphasis (LGLE)                     |
| 10                                                  | High Gray Level Emphasis (HGLE)                    |
| 11                                                  | Small Dependence Low Gray Level Emphasis (SDLGLE)  |
| 12                                                  | Small Dependence High Gray Level Emphasis (SDHGLE) |
| 13                                                  | Large Dependence Low Gray Level Emphasis (LDLGLE)  |
| 14                                                  | Large Dependence High Gray Level Emphasis (LDHGLE) |

- [1] Zwanenburg, A.; Vallieres, M.; Abdalah, M.A.; Aerts, H.; Andrearczyk, V.; Apte, A.; Ashrafinia, S.; Bakas, S.; Beukinga, R.J.; Boellaard, R.; et al. The Image Biomarker Standardization Initiative: Standardized Quantitative Radiomics for High-Throughput Image-based Phenotyping. *Radiology* **2020**, *295*, 328–338. <https://doi.org/10.1148/radiol.2020191145>.

**Supplementary Material Table S3:** Performance the machine learning models on the external test set of each individual sequence T1w, T2w, and T1fsgd using the following model architectures: least absolute shrinkage and selection operator (LASSO), support vector machine (SVM), random forest classifier (RFC), and an artificial neural network (ANN). The external performance represents the values yielded when a final cross-validation step considering only the best 150 best hyperparameter sets was implemented.

| Model Architecture | Score              | T1w                         | T2w                         | T1fsgd                      |
|--------------------|--------------------|-----------------------------|-----------------------------|-----------------------------|
| <b>LASSO</b>       | <b>AUC*</b>        | 0.83 (0.82-0.84) $\pm$ 0.02 | 0.82 (0.81-0.83) $\pm$ 0.04 | 0.84 (0.83-0.85) $\pm$ 0.03 |
|                    | <b>Accuracy</b>    | 0.58                        | 0.69                        | 0.60                        |
|                    | <b>Sensitivity</b> | 0.80                        | 0.42                        | 0.06                        |
|                    | <b>Specificity</b> | 0.43                        | 0.83                        | 1.00                        |
| <b>SVM</b>         | <b>AUC*</b>        | 0.78 (0.76-0.80) $\pm$ 0.07 | 0.81 (0.78-0.84) $\pm$ 0.08 | 0.78 (0.74-0.82) $\pm$ 0.12 |
|                    | <b>Accuracy</b>    | 0.64                        | 0.63                        | 0.65                        |
|                    | <b>Sensitivity</b> | 0.30                        | 0.17                        | 0.24                        |
|                    | <b>Specificity</b> | 0.89                        | 0.88                        | 0.96                        |
| <b>RFC</b>         | <b>AUC*</b>        | 0.80 (0.79-0.81) $\pm$ 0.02 | 0.80 (0.79-0.81) $\pm$ 0.04 | 0.82 (0.81-0.83) $\pm$ 0.04 |
|                    | <b>Accuracy</b>    | 0.70                        | 0.66                        | 0.63                        |
|                    | <b>Sensitivity</b> | 0.35                        | 0.33                        | 0.18                        |
|                    | <b>Specificity</b> | 0.96                        | 0.83                        | 0.96                        |
| <b>ANN</b>         | <b>AUC*</b>        | 0.77 (0.75-0.79) $\pm$ 0.08 | 0.79 (0.76-0.82) $\pm$ 0.08 | 0.79 (0.77-0.81) $\pm$ 0.08 |
|                    | <b>Accuracy</b>    | 0.71                        | 0.58                        | 0.70                        |
|                    | <b>Sensitivity</b> | 0.45                        | 0.08                        | 0.29                        |
|                    | <b>Specificity</b> | 0.89                        | 0.83                        | 1.00                        |

\* Data is given as mean (95% confidence interval)  $\pm$  standard deviation

**Supplementary Material Table S4:** Internal performance representing the averaged values over 150 models resulting from the nested cross-validation using demographic information, radiomic features of each individual sequence T1w, T2w, and T1fsgd or radiomic features of all sequences combined, as well as combining radiomic features (of all sequences) and demographic information for the following model architectures: least absolute shrinkage and selection operator (LASSO), support vector machine (SVM), random forest classifier (RFC), and an artificial neural network (ANN). The metrics are given as mean  $\pm$  standard deviation.

| Model Architecture | Score              | Demographic Features        | T1w                         | T2w                         | T1fsgd                      | Combined Sequences          | Combined Sequences + Demographic Features |
|--------------------|--------------------|-----------------------------|-----------------------------|-----------------------------|-----------------------------|-----------------------------|-------------------------------------------|
| <b>LASSO</b>       | <b>AUC*</b>        | 0.56 (0.55-0.57) $\pm$ 0.06 | 0.83 (0.83-0.83) $\pm$ 0.04 | 0.80 (0.79-0.81) $\pm$ 0.05 | 0.82 (0.81-0.83) $\pm$ 0.05 | 0.88 (0.87-0.89) $\pm$ 0.05 | 0.88 (0.87-0.89) $\pm$ 0.05               |
|                    | <b>Accuracy*</b>   | 0.67 (0.65-0.69) $\pm$ 0.15 | 0.79 (0.79-0.79) $\pm$ 0.04 | 0.78 (0.77-0.79) $\pm$ 0.05 | 0.79 (0.78-0.80) $\pm$ 0.04 | 0.85 (0.84-0.86) $\pm$ 0.04 | 0.85 (0.84-0.86) $\pm$ 0.05               |
|                    | <b>Sensitivity</b> | 0.14                        | 0.41                        | 0.34                        | 0.34                        | 0.51                        | 0.49                                      |
|                    | <b>Specificity</b> | 0.85                        | 0.92                        | 0.91                        | 0.92                        | 0.93                        | 0.94                                      |
| <b>SVM</b>         | <b>AUC*</b>        | 0.56 (0.54-0.58) $\pm$ 0.12 | 0.80 (0.79-0.81) $\pm$ 0.09 | 0.78 (0.77-0.79) $\pm$ 0.08 | 0.75 (0.73-0.77) $\pm$ 0.13 | 0.84 (0.83-0.85) $\pm$ 0.09 | 0.85 (0.84-0.86) $\pm$ 0.08               |
|                    | <b>Accuracy*</b>   | 0.73 (0.73-0.73) $\pm$ 0.03 | 0.78 (0.78-0.78) $\pm$ 0.04 | 0.79 (0.78-0.80) $\pm$ 0.05 | 0.79 (0.78-0.80) $\pm$ 0.05 | 0.84 (0.83-0.85) $\pm$ 0.04 | 0.84 (0.83-0.85) $\pm$ 0.05               |
|                    | <b>Sensitivity</b> | 0.04                        | 0.38                        | 0.37                        | 0.34                        | 0.50                        | 0.45                                      |
|                    | <b>Specificity</b> | 0.97                        | 0.93                        | 0.92                        | 0.91                        | 0.93                        | 0.93                                      |
| <b>RFC</b>         | <b>AUC*</b>        | 0.63 (0.62-0.64) $\pm$ 0.06 | 0.85 (0.84-0.86) $\pm$ 0.05 | 0.79 (0.78-0.80) $\pm$ 0.05 | 0.79 (0.78-0.80) $\pm$ 0.06 | 0.86 (0.85-0.87) $\pm$ 0.05 | 0.87 (0.86-0.88) $\pm$ 0.05               |
|                    | <b>Accuracy*</b>   | 0.69 (0.69-0.69) $\pm$ 0.04 | 0.81 (0.81-0.81) $\pm$ 0.03 | 0.80 (0.80-0.80) $\pm$ 0.03 | 0.80 (0.80-0.80) $\pm$ 0.03 | 0.86 (0.86-0.86) $\pm$ 0.03 | 0.86 (0.86-0.86) $\pm$ 0.03               |
|                    | <b>Sensitivity</b> | 0.23                        | 0.50                        | 0.39                        | 0.36                        | 0.49                        | 0.51                                      |
|                    | <b>Specificity</b> | 0.85                        | 0.92                        | 0.92                        | 0.92                        | 0.95                        | 0.95                                      |
| <b>ANN</b>         | <b>AUC*</b>        | 0.68 (0.67-0.69) $\pm$ 0.08 | 0.78 (0.77-0.79) $\pm$ 0.08 | 0.76 (0.75-0.77) $\pm$ 0.09 | 0.77 (0.76-0.78) $\pm$ 0.08 | 0.83 (0.82-0.84) $\pm$ 0.08 | 0.79 (0.78-0.80) $\pm$ 0.09               |
|                    | <b>Accuracy*</b>   | 0.73 (0.73-0.73) $\pm$ 0.03 | 0.78 (0.77-0.79) $\pm$ 0.05 | 0.77 (0.76-0.78) $\pm$ 0.05 | 0.78 (0.77-0.79) $\pm$ 0.05 | 0.83 (0.82-0.84) $\pm$ 0.04 | 0.84 (0.83-0.85) $\pm$ 0.04               |
|                    | <b>Sensitivity</b> | 0.07                        | 0.49                        | 0.45                        | 0.41                        | 0.53                        | 0.44                                      |
|                    | <b>Specificity</b> | 0.95                        | 0.89                        | 0.86                        | 0.88                        | 0.90                        | 0.94                                      |

\* Data is given as mean (95% confidence interval)  $\pm$  standard deviation

**Supplementary Material Table S5:** Feature Importance of the best performing model (least absolute shrinkage and selection operator (LASSO) trained on features from all radiomic sequences).

| Feature Name                    | Score       |
|---------------------------------|-------------|
| T1fs_original_glszm_ZoneEntropy | 22,30362659 |

|                                                 |             |
|-------------------------------------------------|-------------|
| T1_original_shape_Elongation                    | 21,75575404 |
| T2_original_glszm_ZoneEntropy                   | 19,1399285  |
| T1fs_original_shape_Flatness                    | 14,13490208 |
| T1_original_shape_Maximum2DDiameterRow          | 14,06067563 |
| T2_original_shape_Maximum2DDiameterRow          | 12,80611959 |
| T1_original_ngtgm_Busyness                      | 10,64687961 |
| T2_original_shape_Maximum2DDiameterColumn       | 10,5844085  |
| T1fs_original_firstorder_InterquartileRange     | 9,39608846  |
| T2_original_shape_MajorAxisLength               | 9,064467759 |
| T2_original_shape_Maximum3DDiameter             | 8,953856721 |
| T1fs_original_firstorder_Energy                 | 7,286263865 |
| T1_original_shape_MajorAxisLength               | 6,747650604 |
| T2_original_ngtgm_Complexity                    | 2,597293753 |
| T1_original_shape_Maximum2DDiameterSlice        | 2,586796401 |
| T1fs_original_glcm_DifferenceEntropy            | 1,213683594 |
| T1_original_shape_Maximum3DDiameter             | 1,118527794 |
| T1fs_original_glcm_JointEntropy                 | 0,253434882 |
| T1_original_glszm_LargeAreaLowGrayLevelEmphasis | 0,195501056 |
| T1fs_original_glcm_JointAverage                 | 0,11638087  |

---

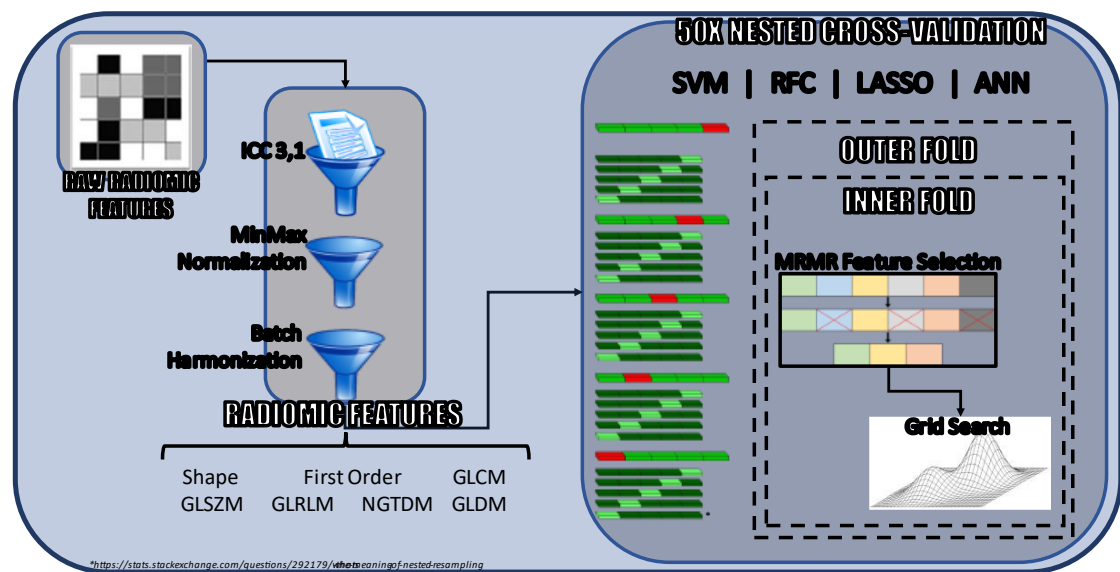

**Supplementary Material Figure S1:** Flow chart of the statistical analysis of the extracted radiomic features.



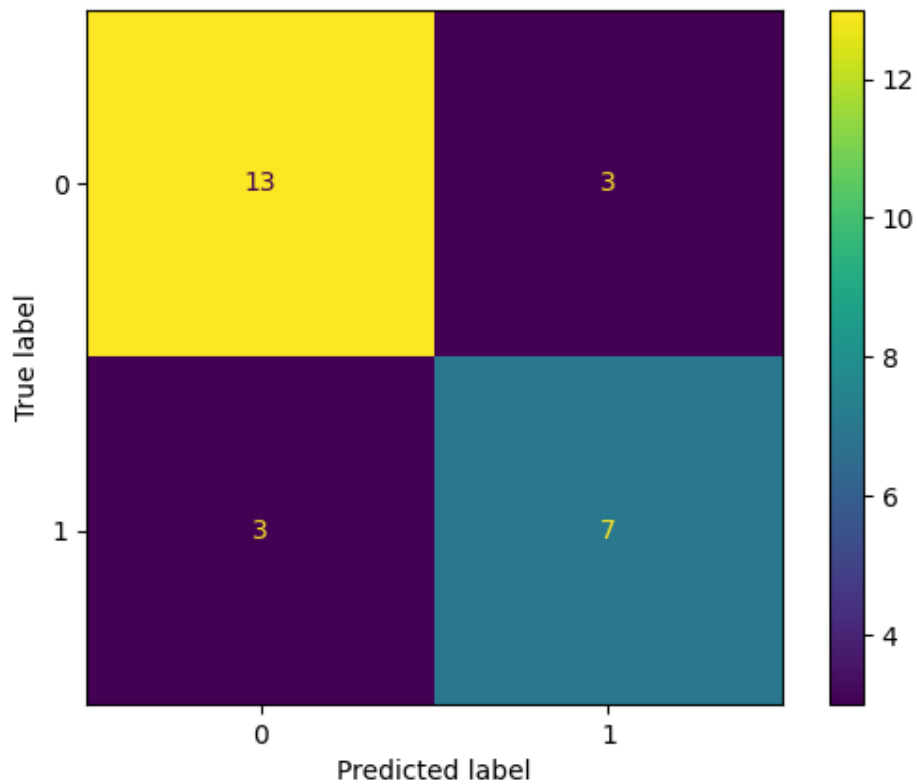

**Supplementary Material Figure S2:** Confusion matrix of the best performing model, a least absolute shrinkage and selection operator (LASSO) trained on all radiomic sequences. Misclassification rate: 0.23  $((FN + FP) / (N + P))$

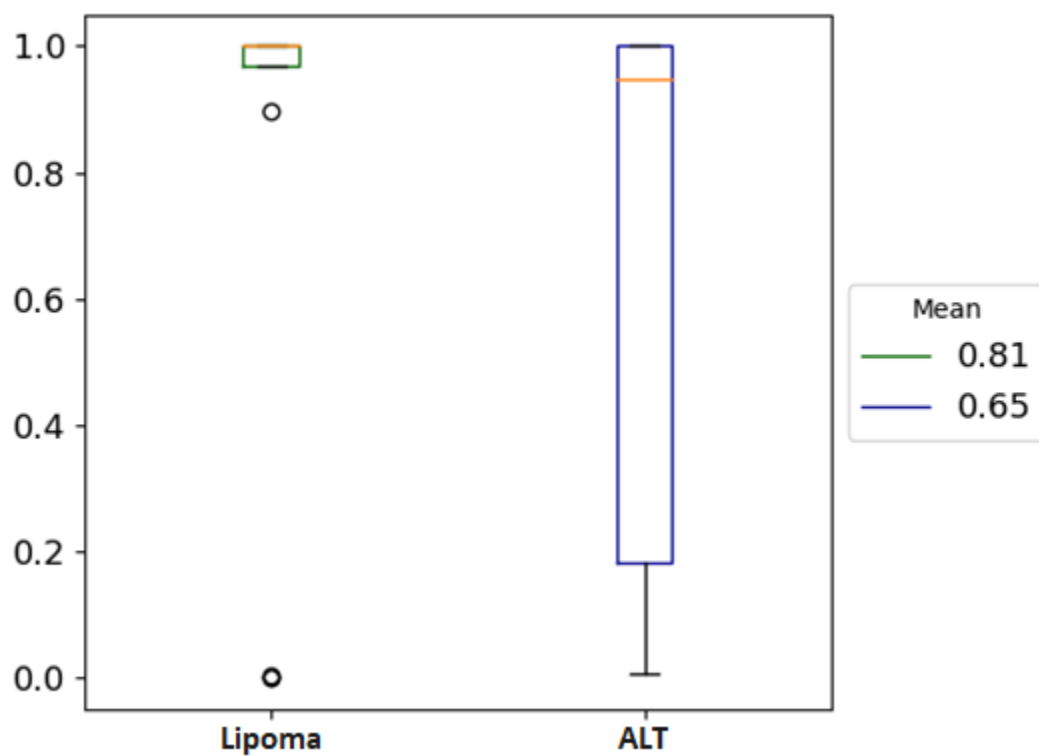

**Supplementary Material Figure S3:** Boxplot of the prediction probabilities made by the best performing model (least absolute shrinkage and selection operator (LASSO) trained on features from all radiomic sequences). The probability cut-off used was 0.5.
